# Supplementary material
Source: Springer Nature journal article supplement (https://www.springermedizin.de/resource/supplementary/12889_2010_2533_MOESM1_ESM.pdf/9486324)

**Loan repayment strategies**

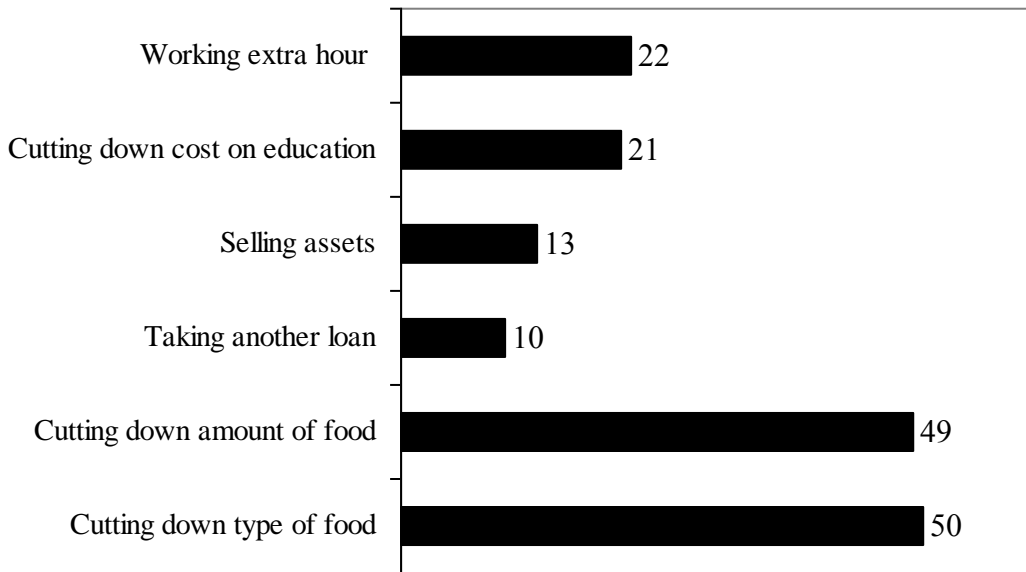

**Percentages of families adopting these strategies**

Supplement: MOESM1 [file 9486324]
